# Supplementary material
Source: HighWire-hosted journal article supplement (https://bmjopen.bmj.com/content/13/6/e065192)
Supplement: inline-supplementary-material-2 [file inline-supplementary-material-2.pdf]

Supplementary Tables

|                                                                                  | Randomised<br>to SPVR (n=8) | Randomised<br>to IPVR (n=11) | Overall<br>(n=19)   |
|----------------------------------------------------------------------------------|-----------------------------|------------------------------|---------------------|
| <b>Any protocol deviation</b>                                                    | <b>2/8 (25.0%)</b>          | <b>6/11 (54.5%)</b>          | <b>8/19 (42.1%)</b> |
| Patient did not meet the trial eligibility criteria but was treated in the trial | 0/8 (0.0%)                  | 0/11 (0.0%)                  | 0/19 (0.0%)         |
| Patient received the alternative treatment to that allocated                     | 0/8 (0.0%)                  | 0/11 (0.0%)                  | 0/19 (0.0%)         |
| Patient did not receive cell saver set up                                        | 2/8 (25.0%)                 | 2/11 (18.2%)                 | 4/19 (21.1%)        |
| Patient became unblinded                                                         | 0/8 (0.0%)                  | 5/11 (45.5%)                 | 5/19 (26.3%)        |

**Abbreviations:** SPVR=Standard Pulmonary valve replacement; IPVR=Injectable Pulmonary valve replacement

Supplementary table 1 Protocol deviations

|                                              |                             | Randomised to<br>SPVR (n=8) | Randomised to<br>IPVR (n=11) | Overall<br>(n=19)    |
|----------------------------------------------|-----------------------------|-----------------------------|------------------------------|----------------------|
| Duration of operation<br>(mins)*             |                             | 3.7 (0.7)                   | 2.9 (1.0)                    | 3.2 (0.9)            |
| Lowest haematocrit (%)                       |                             | 33.4 (5.2)                  | 31.2 (4.2)                   | 32.1 (4.7)           |
| Lowest core temperature<br>(°C) <sup>a</sup> |                             | 34.7 (0.4)                  | 35.0 (1.2)                   | 34.9 (0.9)           |
| Cell saver set up                            |                             | 6/8 (75.0%)                 | 9/11 (81.8%)                 | 15/19 (78.9%)        |
| Volume infused (ml)                          |                             | 393.5 (0.0,<br>535.0)       | 483.0 (244.0,<br>607.0)      | 482.0 (100.0, 607.0) |
| <b>Bypass data</b>                           |                             |                             |                              |                      |
| If blood: Temperature                        | Warm (≥35 °C)               | 1/5 (20.0%)                 | 1/2 (50.0%)                  | 2/7 (28.6%)          |
|                                              | Cold (<35 °C)               | 4/5 (80.0%)                 | 1/2 (50.0%)                  | 5/7 (71.4%)          |
| Infusion mode                                | Antegrade                   | 5/5 (100.0%)                | 2/2 (100.0%)                 | 7/7 (100.0%)         |
| Timing                                       | Continuous                  | 1/5 (20.0%)                 | 0/2 (0.0%)                   | 1/7 (14.3%)          |
|                                              | Intermittent                | 4/5 (80.0%)                 | 2/2 (100.0%)                 | 6/7 (85.7%)          |
| Duration of bypass (mins)                    |                             | 71.8 (17.2)                 | 42.7 (19.2)                  | 59.3 (22.9)          |
| <b>Arrhythmias</b>                           |                             |                             |                              |                      |
| During procedure                             | AV block                    | 0/8 (0.0%)                  | 0/11 (0.0%)                  | 0/19 (0.0%)          |
|                                              | Nodal                       | 0/8 (0.0%)                  | 1/11 (9.1%)                  | 1/19 (5.3%)          |
|                                              | JET                         | 0/8 (0.0%)                  | 0/11 (0.0%)                  | 0/19 (0.0%)          |
|                                              | Atrial fibrillation/flutter | 3/8 (37.5%)                 | 1/11 (9.1%)                  | 4/19 (21.1%)         |
|                                              | Ventricular tachycardia     | 0/8 (0.0%)                  | 0/11 (0.0%)                  | 0/19 (0.0%)          |
|                                              | Ventricular fibrillation    | 1/8 (12.5%)                 | 5/11 (45.5%)                 | 6/19 (31.6%)         |
|                                              | None                        | 4/8 (50.0%)                 | 6/11 (54.5%)                 | 10/19 (52.6%)        |
| On chest closure                             | AV block                    | 0/8 (0.0%)                  | 0/11 (0.0%)                  | 0/19 (0.0%)          |
|                                              | Nodal                       | 0/8 (0.0%)                  | 0/11 (0.0%)                  | 0/19 (0.0%)          |
|                                              | JET                         | 0/8 (0.0%)                  | 0/11 (0.0%)                  | 0/19 (0.0%)          |
|                                              | Atrial fibrillation/flutter | 1/8 (12.5%)                 | 0/11 (0.0%)                  | 1/19 (5.3%)          |
|                                              | Ventricular tachycardia     | 0/8 (0.0%)                  | 0/11 (0.0%)                  | 0/19 (0.0%)          |
|                                              | Ventricular fibrillation    | 0/8 (0.0%)                  | 0/11 (0.0%)                  | 0/19 (0.0%)          |
|                                              | None                        | 7/8 (87.5%)                 | 11/11 (100.0%)               | 18/19 (94.7%)        |
| Pacing                                       | Single chamber              | 1/8 (12.5%)                 | 0/11 (0.0%)                  | 1/19 (5.3%)          |
|                                              | Dual chamber                | 1/8 (12.5%)                 | 2/11 (18.2%)                 | 3/19 (15.8%)         |
|                                              | None                        | 6/8 (75.0%)                 | 9/11 (81.8%)                 | 15/19 (78.9%)        |
| <b>Products used intra-operatively</b>       |                             |                             |                              |                      |
| Blood products used intra-operatively        | RBC                         | 0/8 (0.0%)                  | 4/11 (36.4%)                 | 4/19 (21.1%)         |
|                                              | FFP                         | 1/8 (12.5%)                 | 0/11 (0.0%)                  | 1/19 (5.3%)          |
|                                              | Platelets                   | 0/8 (0.0%)                  | 0/11 (0.0%)                  | 0/19 (0.0%)          |
|                                              | Cryoprecipitate             | 1/8 (12.5%)                 | 0/11 (0.0%)                  | 1/19 (5.3%)          |
| Activated factor VIII                        |                             | 0/8 (0.0%)                  | 0/11 (0.0%)                  | 0/19 (0.0%)          |
| Tranexamic acid                              |                             | 4/8 (50.0%)                 | 7/11 (63.6%)                 | 11/19 (57.9%)        |
| Dose (g)                                     |                             | 10.6 (1.1, 166.0)           | 1.1 (1.0, 2.3)               | 1.3 (1.0, 20.0)      |
| Aprotinin                                    |                             | 4/8 (50.0%)                 | 1/11 (9.1%)                  | 5/19 (26.3%)         |
| Dose (million units)                         |                             | 6.0 (4.5, 6.5)              | 6.0 (6.0, 6.0)               | 6.0 (5.5, 6.5)       |
| Protamine                                    |                             | 8/8 (100.0%)                | 10/11 (90.9%)                | 18/19 (94.7%)        |

|                                     | Randomised to<br>SPVR (n=8)      | Randomised to<br>IPVR (n=11)  | Overall<br>(n=19)             |
|-------------------------------------|----------------------------------|-------------------------------|-------------------------------|
| Dose (mg)                           | 275.0 (200.0,<br>350.0)          | 152.5 (100.0,<br>270.0)       | 225.0 (100.0, 300.0)          |
| Heparin                             | 8/8 (100.0%)                     | 10/11 (90.9%)                 | 18/19 (94.7%)                 |
|                                     | 26500.0<br>(19000.0,<br>30000.0) | 15000.0 (10000.0,<br>25000.0) | 20000.0 (15000.0,<br>27000.0) |
| Dose (IU)                           |                                  |                               |                               |
| Hydroxyethyl starch                 | 0/4 (0.0%)                       | 1/5 (20.0%)                   | 1/9 (11.1%)                   |
| Human Albumen Solution              | 0/8 (0.0%)                       | 0/11 (0.0%)                   | 0/19 (0.0%)                   |
| Plasma-Lyte                         | 5/8 (62.5%)                      | 7/11 (63.6%)                  | 12/19 (63.2%)                 |
| Gelofusine                          | 0/5 (0.0%)                       | 0/4 (0.0%)                    | 0/9 (0.0%)                    |
| Hartmann's solution                 | 6/8 (75.0%)                      | 5/11 (45.5%)                  | 11/19 (57.9%)                 |
| Status at end of operation    Alive | 8/8 (100.0%)                     | 11/11 (100.0%)                | 19/19 (100.0%)                |

**Notes:**

\* Duration of operation defined as knife to skin to knife down time

Data are presented as mean (SD), median (IQR) or n (%)

Missing data (SPVR, IPVR):

<sup>a</sup> Data missing for 1 patient (0, 1)

**Abbreviations:** SPVR=Standard Pulmonary valve replacement; IPVR=Injectable Pulmonary valve replacement; SD=Standard deviation; AV=Atrioventricular block; JET=Junctional ectopic tachycardia; RBC=Red blood cells; FFP=Fresh frozen plasma; GTN= Glyceryl Trinitrate; VF= Ventricular fibrillation; RVOT= right ventricular outflow tract; PA= Pulmonary Artery; CPB=Cardiopulmonary bypass

*Supplementary table 2 Additional intra operative characteristics*

|                                                  |                    | Randomised to<br>SPVR (n=8) | Randomised to<br>IPVR (n=11) | Overall<br>(n=19)    |
|--------------------------------------------------|--------------------|-----------------------------|------------------------------|----------------------|
| <b>On return from theatre</b>                    |                    |                             |                              |                      |
| Lactate (mmol/l)                                 |                    | 0.9 (0.3)                   | 1.2 (0.6)                    | 1.1 (0.5)            |
| Temperature (°C)                                 |                    | 36.5 (0.7)                  | 36.6 (0.9)                   | 36.5 (0.8)           |
| <b>Fluid balance</b>                             |                    |                             |                              |                      |
| Fluid balance at 12 hours (ml)                   |                    | 329.5 (62.0, 687.0)         | 11.0 (-273.0, 289.0)         | 166.0 (-65.0, 556.0) |
| <b>Blood results during first 24 hrs post op</b> |                    |                             |                              |                      |
| Lowest haemoglobin (g/dl)                        |                    | 55.5 (11.8, 110.5)          | 94.0 (10.3, 127.0)           | 94.0 (10.3, 124.0)   |
| Lowest MABP (mm HG)                              |                    | 62.6 (9.1)                  | 62.1 (10.5)                  | 62.3 (9.7)           |
| Lowest haematocrit (%)                           |                    | 33.9 (5.2)                  | 31.1 (10.8)                  | 32.3 (8.8)           |
| Highest lactate (mmol/l)                         |                    | 1.3 (1.2, 1.5)              | 1.5 (0.8, 2.8)               | 1.4 (1.0, 2.0)       |
| Activated factor VIII                            | During first 24hr  | 0/8 (0.0%)                  | 0/11 (0.0%)                  | 0/19 (0.0%)          |
|                                                  | 24hr to discharge  | 0/8 (0.0%)                  | 0/11 (0.0%)                  | 0/19 (0.0%)          |
| <b>Reoperations</b>                              |                    |                             |                              |                      |
| Reoperation                                      |                    | 0/8 (0.0%)                  | 2/11 (18.2%)                 | 2/19 (10.5%)         |
| Type                                             | Chest reopened     | -                           | 2/2 (100.0%)                 | 2/2 (100.0%)         |
| If chest reopened, reason:                       | Tamponade          | -                           | 0/2 (0.0%)                   | 0/2 (0.0%)           |
|                                                  | Bleeding           | -                           | 0/2 (0.0%)                   | 0/2 (0.0%)           |
|                                                  | Mediastinitis      | -                           | 0/2 (0.0%)                   | 0/2 (0.0%)           |
|                                                  | Cardiac arrest     | -                           | 0/2 (0.0%)                   | 0/2 (0.0%)           |
|                                                  | Low cardiac output | -                           | 0/2 (0.0%)                   | 0/2 (0.0%)           |
|                                                  | Other*             | -                           | 2/2 (100.0%)                 | 2/2 (100.0%)         |

**Notes:**

Data are presented as mean (SD), median (IQR) or n (%)

\* Other reasons for chest reopening:

Significant pulmonary regurgitation on TTE, reoperation for PVR on bypass (n=1).

Three swabs left inside patient found on post-operative chest x-ray, chest re-opened on PICU to retrieve swabs (n=1).

**Abbreviations:** SPVR=Standard Pulmonary valve replacement; IPVR=Injectable Pulmonary valve replacement; SD=Standard deviation; MABP=Mean arterial blood pressure

*Supplementary table 3 Post-operative details*

|                                             |                     | Randomised to<br>SPVR (n=8*) | Randomised to<br>IPVR (n=9*) | Overall<br>(n=17*)   |
|---------------------------------------------|---------------------|------------------------------|------------------------------|----------------------|
| Heart rate (bpm) <sup>a</sup>               |                     | 79.5 (70.5, 85.0)            | 66.5 (59.0, 75.0)            | 75.0 (62.5, 82.5)    |
| <b>LV function</b>                          |                     |                              |                              |                      |
| LV function                                 | Good                | 4/8 (50.0%)                  | 6/9 (66.7%)                  | 10/17 (58.8%)        |
|                                             | Mildly impaired     | 3/8 (37.5%)                  | 3/9 (33.3%)                  | 6/17 (35.3%)         |
|                                             | Moderately impaired | 1/8 (12.5%)                  | 0/9 (0.0%)                   | 1/17 (5.9%)          |
| Global longitudinal strain (%) <sup>b</sup> |                     | -19.4 (-19.4, -19.4)         | -19.0 (-21.0, -15.0)         | -19.0 (-21.0, -15.0) |
| Biplane ejection fraction (%) <sup>c</sup>  |                     | 56.0 (47.0, 69.0)            | 66.0 (51.0, 67.0)            | 61.0 (51.0, 67.0)    |
| MAPSE lateral (cm) <sup>d</sup>             |                     | 1.4 (1.3, 1.7)               | 1.7 (1.3, 2.1)               | 1.6 (1.3, 1.8)       |
| MAPSE septal (cm) <sup>e</sup>              |                     | 1.2 (1.0, 1.3)               | 1.2 (1.1, 1.4)               | 1.2 (1.0, 1.3)       |
| <b>Mitral Inflow Doppler</b>                |                     |                              |                              |                      |
| E wave velocity (cm/s)                      |                     | 83.9 (76.0, 95.3)            | 77.0 (72.0, 90.0)            | 80.0 (73.3, 90.7)    |
| A wave velocity (cm/s)                      |                     | 64.5 (51.0, 90.3)            | 63.0 (59.1, 80.0)            | 63.0 (55.0, 82.5)    |
| E/A wave ratio                              |                     | 1.2 (1.1, 1.5)               | 1.3 (1.1, 1.8)               | 1.2 (1.1, 1.7)       |
| E wave deceleration time (ms) <sup>f</sup>  |                     | 220.0 (159.0, 239.0)         | 156.5 (130.5, 174.0)         | 159.0 (155.0, 220.0) |
| <b>Tissue Doppler (pulse wave)</b>          |                     |                              |                              |                      |
| LV E/E' (cm/s) <sup>g</sup>                 |                     | 8.0 (7.7, 12.0)              | 6.4 (6.0, 7.3)               | 7.5 (6.0, 8.6)       |
| <b>RV function</b>                          |                     |                              |                              |                      |
| RV function                                 | Good                | 2/7 (28.6%)                  | 3/8 (37.5%)                  | 5/15 (33.3%)         |
|                                             | Mildly impaired     | 3/7 (42.9%)                  | 2/8 (25.0%)                  | 5/15 (33.3%)         |
|                                             | Moderately impaired | 2/7 (28.6%)                  | 3/8 (37.5%)                  | 5/15 (33.3%)         |
| TAPSE (mm) <sup>h</sup>                     |                     | 14.0 (12.0, 18.0)            | 16.0 (12.0, 18.0)            | 15.5 (12.0, 18.0)    |
| <b>Tricuspid valve</b>                      |                     |                              |                              |                      |
| E wave velocity (cm/s) <sup>i</sup>         |                     | 65.0 (48.0, 82.0)            | 59.1 (52.0, 71.0)            | 63.5 (52.0, 75.0)    |
| A wave velocity (cm/s) <sup>j</sup>         |                     | 47.5 (34.0, 56.0)            | 45.0 (39.0, 51.4)            | 47.5 (37.0, 51.4)    |
| E/A wave velocity (cm/s) <sup>k</sup>       |                     | 1.3 (1.1, 1.8)               | 1.3 (1.1, 1.5)               | 1.3 (1.1, 1.6)       |
| <b>Tissue Doppler (pulse wave)</b>          |                     |                              |                              |                      |
| RV S wave velocity (cm/s) <sup>l</sup>      |                     | 6.7 (4.6, 8.0)               | 9.1 (7.6, 10.6)              | 8.0 (6.4, 10.0)      |
| RV A wave velocity (cm/s) <sup>m</sup>      |                     | 5.1 (4.0, 7.0)               | 4.2 (3.7, 12.3)              | 4.9 (4.0, 8.0)       |
| RV E wave velocity (cm/s) <sup>n</sup>      |                     | 7.0 (5.0, 8.4)               | 6.6 (6.0, 9.0)               | 6.8 (6.0, 8.4)       |
| RV E/E' (cm/s) <sup>o</sup>                 |                     | 7.6 (2.9, 10.7)              | 7.3 (6.3, 7.9)               | 7.3 (4.0, 10.4)      |
| RVOT velocity given                         |                     | 7/8 (87.5%)                  | 7/9 (77.8%)                  | 14/17 (82.4%)        |
| RVOT velocity (m/s)                         |                     | 0.9 (0.7, 1.4)               | 1.0 (0.9, 1.4)               | 0.9 (0.8, 1.4)       |
| TR velocity given                           |                     | 5/8 (62.5%)                  | 5/9 (55.6%)                  | 10/17 (58.8%)        |
| TR velocity (m/s)                           |                     | 2.5 (2.3, 2.7)               | 2.9 (2.8, 3.2)               | 2.7 (2.5, 3.0)       |
| <b>Pulmonary valve function</b>             |                     |                              |                              |                      |
| Peak velocity (m/s)                         |                     | 2.6 (2.3, 2.8)               | 2.4 (1.9, 2.8)               | 2.5 (2.2, 2.8)       |
| Peak gradient (mmHg)                        |                     | 26.5 (17.1, 32.3)            | 23.0 (14.0, 30.0)            | 24.0 (14.0, 30.0)    |
| Pulmonary regurgitation                     |                     | 3/8 (37.5%)                  | 5/9 (55.6%)                  | 8/17 (47.1%)         |
| Severity                                    | Mild                | 2/2 (100.0%)                 | 4/4 (100.0%)                 | 6/6 (100.0%)         |

**Notes:**

Data are presented as median (IQR) or n (%)

\* Two participants did not have 6-month Echo data available (n=0 SPVR, 2 IPVR)

Missing data (SPVR, IPVR):<sup>a</sup> Data missing for 1 patient (0, 1);<sup>b</sup> Data missing for 10 patients (7, 3);<sup>c</sup> Data missing for 7 patients (5, 2);<sup>d</sup> Data missing for 6 patients (3, 3);<sup>e</sup> Data missing for 6 patients (3, 3);<sup>f</sup> Data missing for 8 patients (3, 5);<sup>g</sup> Data missing for 3 patients (1, 2);<sup>h</sup> Data missing for 1 patient (1, 0);<sup>i</sup> Data

missing for 3 patients (1, 2);<sup>j</sup> Data missing for 4 patients (1, 3);<sup>k</sup> Data missing for 5 patients (1, 4);<sup>l</sup> Data missing for 1 patient (1, 0);<sup>m</sup> Data missing for 3 patients (1, 2);<sup>n</sup> Data missing for 3 patients (1, 2);<sup>o</sup> Data missing for 5 patients (2, 3)

**Abbreviations:** SPVR=Standard Pulmonary valve replacement; IPVR=Injectable Pulmonary valve replacement; SD=Standard deviation; LV=Left ventricular; MAPSE= Mitral annular plane systolic excursion; RV= Right ventricular; TAPSE= Tricuspid annular plane systolic excursion; RVOT= right ventricular outflow tract; TR= Tricuspid regurgitation

*Supplementary table 4 Post-Operative echocardiographic assessment at 6 months*

|                                    |                              | Randomised to SPVR<br>(n=8*) | Randomised to IPVR<br>(n=9*) | Overall<br>(n=17*)   |
|------------------------------------|------------------------------|------------------------------|------------------------------|----------------------|
| Heart rate (bpm)                   |                              | 73.3 (62.0, 78.1)            | 70.3 (60.1, 80.2)            | 72.9 (61.6, 80.0)    |
| <b>Cardiac MRI</b>                 |                              |                              |                              |                      |
| <b>LV</b>                          |                              |                              |                              |                      |
| Ejection fraction (%)              |                              | 63.7 (53.8, 73.2)            | 60.3 (55.5, 63.1)            | 62.3 (55.5, 67.0)    |
| End diastolic volume               | Absolute (ml)                | 146.6 (122.8, 172.4)         | 115.6 (110.1, 130.5)         | 128.6 (111.7, 153.8) |
|                                    | Indexed (ml/m <sup>2</sup> ) | 76.6 (58.2, 97.9)            | 64.8 (62.7, 74.7)            | 68.0 (59.9, 81.0)    |
| End systolic volume                | Absolute(ml)                 | 53.3 (36.2, 79.8)            | 47.0 (42.6, 48.9)            | 47.0 (41.6, 61.6)    |
|                                    | Indexed (ml/m <sup>2</sup> ) | 30.9 (16.7, 39.4)            | 28.8 (25.1, 30.5)            | 28.8 (22.7, 37.1)    |
| Stroke volume                      | Absolute (ml)                | 89.8 (75.9, 107.0)           | 73.0 (61.1, 94.4)            | 83.7 (67.9, 100.6)   |
|                                    | Indexed (ml/m <sup>2</sup> ) | 42.8 (38.4, 65.8)            | 42.9 (32.9, 46.1)            | 42.8 (35.2, 53.1)    |
| Cardiac output                     | Absolute (l/min)             | 6.3 (5.6, 7.2)               | 4.5 (4.3, 5.7)               | 5.7 (4.5, 6.5)       |
| Cardiac index                      | Indexed                      |                              |                              |                      |
|                                    | (l/min/m <sup>2</sup> )      | 3.3 (3.2, 4.0)               | 3.1 (2.6, 3.4)               | 3.3 (2.6, 3.7)       |
| Mass                               | Absolute (g/m <sup>2</sup> ) | 106.9 (95.7, 147.8)          | 79.9 (69.4, 92.6)            | 92.6 (74.7, 132.9)   |
|                                    | Indexed (g/m <sup>2</sup> )  | 62.1 (51.1, 70.1)            | 51.1 (40.8, 56.3)            | 55.2 (45.3, 68.9)    |
| GLS (%)                            |                              | -14.9 (-18.4, -11.6)         | -14.0 (-18.0, -12.0)         | -14.0 (-18.0, -12.0) |
| <b>RV</b>                          |                              |                              |                              |                      |
| Ejection fraction (%)              |                              | 49.1 (43.3, 51.1)            | 45.2 (39.5, 48.4)            | 48.4 (39.9, 49.2)    |
| End diastolic volume               | Absolute (ml)                | 178.8 (169.5, 201.2)         | 159.8 (131.9, 205.0)         | 172.3 (133.5, 205.0) |
|                                    | Indexed (ml/m <sup>2</sup> ) | 105.6 (75.3, 113.5)          | 94.0 (78.5, 97.8)            | 94.0 (77.3, 111.3)   |
| End systolic volume                | Absolute(ml)                 | 93.7 (76.4, 119.9)           | 87.1 (80.8, 107.8)           | 87.1 (80.8, 112.4)   |
|                                    | Indexed (ml/m <sup>2</sup> ) | 47.6 (39.1, 65.1)            | 51.5 (47.5, 60.6)            | 51.5 (40.7, 61.7)    |
| Stroke volume                      | Absolute (ml)                | 86.6 (73.2, 96.6)            | 72.9 (52.7, 92.6)            | 82.1 (63.8, 92.6)    |
|                                    | Indexed (ml/m <sup>2</sup> ) | 42.2 (36.0, 59.2)            | 42.5 (31.0, 45.5)            | 42.5 (35.5, 56.7)    |
| Cardiac output                     | Absolute (l/min)             | 6.0 (5.1, 7.2)               | 4.6 (4.5, 5.5)               | 5.2 (4.6, 6.6)       |
| Cardiac index                      | Indexed                      |                              |                              |                      |
|                                    | (l/min/m <sup>2</sup> )      | 3.0 (2.3, 3.6)               | 2.4 (2.2, 2.9)               | 2.7 (2.2, 3.1)       |
| GLS (%)                            |                              | -18.1 (-19.9, -9.8)          | -20.0 (-22.5, -18.1)         | -19.0 (-21.0, -12.6) |
| <b>LA biplane</b>                  |                              |                              |                              |                      |
| End diastolic volume (ml)          |                              | 36.6 (29.0, 44.0)            | 18.1 (16.8, 36.3)            | 33.0 (17.5, 39.8)    |
| End systolic volume (ml)           |                              | 70.8 (58.1, 79.8)            | 45.7 (41.1, 48.6)            | 56.0 (42.6, 71.8)    |
| <b>Pulmonary valve function **</b> |                              |                              |                              |                      |
| Peak velocity (cm/s)               | MPA                          | 243.1 (155.1, 279.2)         | 190.9 (171.4, 236.4)         | 199.3 (163.0, 253.8) |
|                                    | LPA <sup>a</sup>             | 142.4 (124.7, 149.9)         | 117.7 (100.4, 134.6)         | 128.1 (111.6, 147.2) |
|                                    | RPA <sup>b</sup>             | 137.5 (114.9, 148.4)         | 105.6 (88.5, 111.1)          | 112.2 (97.6, 142.8)  |
| Antegrade (ml)                     | MPA                          | 111.4 (83.8, 114.8)          | 88.4 (65.8, 96.6)            | 94.2 (71.9, 111.5)   |
|                                    | LPA <sup>c</sup>             | 41.4 (24.8, 42.8)            | 40.9 (28.3, 42.8)            | 41.2 (28.3, 42.8)    |
|                                    | RPA <sup>d</sup>             | 47.3 (39.1, 66.5)            | 43.3 (25.6, 49.1)            | 46.1 (35.8, 51.4)    |
| Retrograde (ml)                    | MPA                          | 0.0 (0.0, 0.6)               | 1.9 (0.4, 3.4)               | 0.4 (0.0, 1.9)       |
|                                    | LPA <sup>e</sup>             | 3.5 (2.2, 6.0)               | 2.1 (1.6, 5.6)               | 2.9 (2.0, 5.6)       |
|                                    | RPA <sup>f</sup>             | 0.2 (0.1, 0.4)               | 1.2 (0.4, 2.2)               | 0.4 (0.1, 1.7)       |
| Net stroke volume (ml)             | MPA                          | 111.3 (83.5, 114.1)          | 88.4 (64.8, 94.2)            | 89.0 (68.6, 111.4)   |
|                                    | LPA <sup>g</sup>             | 36.8 (15.4, 39.8)            | 35.3 (23.0, 40.9)            | 36.3 (23.0, 39.8)    |
|                                    | RPA <sup>h</sup>             | 47.1 (38.7, 66.4)            | 42.1 (24.2, 47.8)            | 45.2 (34.6, 51.2)    |
| Net flow (l/min)                   | MPA                          | 7.3 (6.9, 7.7)               | 5.0 (4.7, 6.7)               | 6.7 (4.8, 7.5)       |
|                                    | LPA <sup>i</sup>             | 2.7 (1.5, 3.0)               | 2.9 (2.3, 3.0)               | 2.8 (2.3, 3.0)       |
|                                    | RPA <sup>j</sup>             | 3.4 (2.8, 5.0)               | 2.7 (2.1, 3.7)               | 3.1 (2.6, 4.0)       |

|                                                      | Randomised to SPVR<br>(n=8*) | Randomised to IPVR<br>(n=9*) | Overall<br>(n=17*) |
|------------------------------------------------------|------------------------------|------------------------------|--------------------|
| End diastolic A wave                                 | 0/8 (0.0%)                   | 0/9 (0.0%)                   | 0/17 (0.0%)        |
| If yes, volume (ml)                                  | 0.0 (0.0, 0.0)               | 0.0 (0.0, 0.0)               | 0.0 (0.0, 0.0)     |
| MPA regurgitation fraction<br>(%)                    | 0.0 (0.0, 0.8)               | 2.0 (0.3, 4.7)               | 0.7 (0.0, 2.0)     |
| MPA regurgitation fraction –<br>A wave corrected (%) | 0.0 (0.0, 0.8)               | 2.0 (0.3, 4.7)               | 0.7 (0.0, 2.0)     |

**Notes:**

Data are presented as median (IQR), mean (SD) or n (%)

\* Two participants did not have 6-month MRI data available (n=0 SPVR, 2 IPVR)

\*\* MRI assessment technique: Free breathing for n=17 (8 SPVR, 9 IPVR)

Missing data (SPVR, IPVR): <sup>a</sup> Data missing for 3 patients (1, 2); <sup>b</sup> Data missing for 1 patient (0, 1); <sup>c</sup> Data missing for 3 patients (1, 2); <sup>d</sup> Data missing for 1 patient (0, 1); <sup>e</sup> Data missing for 3 patients (1, 2); <sup>f</sup> Data missing for 1 patient (0, 1); <sup>g</sup> Data missing for 3 patients (1, 2); <sup>h</sup> Data missing for 1 patient (0, 1); <sup>i</sup> Data missing for 3 patients (1, 2); <sup>j</sup> Data missing for 1 patient (0, 1)

**Abbreviations:** SPVR=Standard Pulmonary valve replacement; IPVR=Injectable Pulmonary valve replacement; SD=Standard deviation; LV=Left ventricular; RV= Right ventricular; MPA=Main pulmonary artery; LPA= Left pulmonary artery; RPA= Right pulmonary artery; GLS=Global longitudinal strain; LA=Left atrial; MRI=magnetic resonance imaging

*Supplementary table 5 – Post-operative MRI assessment at 6 months.*



| Outcome                                                                  | Randomised to SPVR<br>(n=8) | Randomised to IPVR<br>(n=11) | Mean difference<br>(95% CI)* | p-value |
|--------------------------------------------------------------------------|-----------------------------|------------------------------|------------------------------|---------|
| Chest drain volume in first 24hrs post-op hours (ml)                     | 633.8 (249.8)               | 340.0 (167.3)                | -277.6 (-484.0, -71.2)       | 0.005   |
| Post-hoc sensitivity analysis: primary analysis adjusted for age and sex | -                           | -                            | -286.6 (-512.6, -60.7)       | 0.005   |

**Notes:**

Data are presented as mean (SD) or MD (95% CI) \*Mean difference adjusted for centre.

**Abbreviations:** SPVR=Standard Pulmonary valve replacement; IPVR=Injectable Pulmonary valve replacement; CI=Confidence interval; MD=Mean difference

*Supplementary table 6 – Primary outcome: Chest drain volume*

| Outcome                                    | Randomised to<br>SPVR (n=8) | Randomised to<br>IPVR (n=11) | HR<br>(95% CI)    | p-value |
|--------------------------------------------|-----------------------------|------------------------------|-------------------|---------|
| Time to readiness for extubation (hours) * | 6.8 (4.8, 7.7)              | 7.5 (5.6, 16.1)              | 0.69 (0.26, 1.88) | 0.476   |
| Time to first ICU discharge (hours)        | 17.0 (8.6, 32.2)            | 23.0 (16.5, 62.1)            | 0.50 (0.17, 1.48) | 0.209   |
| Total length of ICU stay (hours) **        | 18.6 (9.0, 33.1)            | 23.0 (16.5, 62.1)            |                   |         |
| Time to fitness for discharge (days) *** x | 8.0 (5.0, -)                | 7.0 (4.0, -)                 | 1.48 (0.36, 6.02) | 0.577   |

**Notes:**

Data are presented as median (IQR) or HR (95% CI)

\* Date/time extubation performed used if date/time ready for extubation is missing (n=2: 2 SPVR, 0 IPVR)

\*\* Includes duration of any re-admissions to ICU prior to hospital discharge

\*\*\* Fitness for discharge defined as all:

- Temperature: 36-38°C
- Heart rate: 60-100 beats/min for paediatrics, <90 beats/min for adults
- Oxygen saturation on air: ≥ 95%
- Respiration: 12-30 for paediatrics, 10-30 for adults
- White blood count: <12 x 10<sup>9</sup>/L
- C-reactive protein (CRP): Showing downward trend
- Bowel function: bowel has opened after surgery
- Physically mobile: physical ability has reached pre-surgery level

**Abbreviations:** SPVR=Standard Pulmonary valve replacement; IPVR=Injectable Pulmonary valve replacement; ICU= intensive care unit; IQR=Interquartile Range; HR=Hazard ratio; CI=Confidence interval

*Supplementary table 7— Treatment estimates – secondary outcomes*

| Questionnaire domain *     |                                             | Randomised to SPVR<br>(n=8) | Randomised to IPVR<br>(n=11) |
|----------------------------|---------------------------------------------|-----------------------------|------------------------------|
| <b>EQ-5D **</b>            |                                             |                             |                              |
| Summary index score        | <i>6 weeks post-operative</i>               | <b>0.7 (0.6, 0.8)</b>       | <b>0.8 (0.7, 0.8)</b>        |
|                            | <i>6 months post-operative</i>              | <b>0.8 (0.7, 1.0)</b>       | <b>0.8 (0.7, 1.0)</b>        |
| Visual analogue scale      | <i>6 weeks post-operative</i>               | 82.5 (67.5, 87.5)           | 67.5 (50.0, 86.0)            |
|                            | <i>6 months post-operative <sup>a</sup></i> | 91.0 (70.0, 95.0)           | 83.5 (70.0, 95.0)            |
| <b>SF-36 ***</b>           |                                             |                             |                              |
| Physical component summary | <i>6 weeks post-operative</i>               | <b>39.9 (36.9, 48.2)</b>    | <b>36.3 (33.3, 46.3)</b>     |
|                            | <i>6 months post-operative</i>              | <b>48.9 (45.0, 56.2)</b>    | <b>51.8 (45.4, 58.7)</b>     |
| Mental component summary   | <i>6 weeks post-operative</i>               | <b>52.3 (33.9, 58.2)</b>    | <b>47.4 (46.8, 57.5)</b>     |
|                            | <i>6 months post-operative</i>              | <b>51.8 (27.2, 57.6)</b>    | <b>53.1 (38.9, 58.9)</b>     |
| Physical functioning       | <i>6 weeks post-operative</i>               | 47.0 (42.2, 50.8)           | 40.3 (38.4, 44.2)            |
|                            | <i>6 months post-operative</i>              | 49.9 (46.1, 57.5)           | 53.7 (46.1, 57.5)            |
| Role – physical            | <i>6 weeks post-operative</i>               | 34.7 (28.0, 44.8)           | 30.2 (28.0, 39.2)            |
|                            | <i>6 months post-operative</i>              | 48.2 (43.7, 57.2)           | 48.2 (39.2, 57.2)            |
| Bodily pain                | <i>6 weeks post-operative</i>               | 38.6 (28.3, 49.1)           | 38.2 (34.6, 51.5)            |
|                            | <i>6 months post-operative</i>              | 51.5 (42.2, 62.0)           | 51.5 (50.7, 55.5)            |
| General health             | <i>6 weeks post-operative</i>               | 49.6 (37.3, 59.8)           | 46.0 (45.1, 55.6)            |
|                            | <i>6 months post-operative</i>              | 47.5 (30.8, 61.7)           | 55.6 (43.7, 66.5)            |
| Vitality                   | <i>6 weeks post-operative</i>               | 46.7 (37.7, 58.5)           | 49.6 (31.8, 52.6)            |
|                            | <i>6 months post-operative</i>              | 46.7 (28.8, 61.5)           | 52.6 (43.7, 64.5)            |
| Social functioning         | <i>6 weeks post-operative</i>               | 49.8 (39.8, 54.8)           | 47.3 (37.3, 57.3)            |
|                            | <i>6 months post-operative</i>              | 52.3 (37.3, 57.3)           | 57.3 (42.3, 57.3)            |
| Role - emotional           | <i>6 weeks post-operative</i>               | 35.3 (28.3, 54.4)           | 42.2 (24.8, 56.2)            |
|                            | <i>6 months post-operative</i>              | 49.2 (42.2, 56.2)           | 52.7 (45.7, 56.2)            |
| Mental health              | <i>6 weeks post-operative</i>               | 54.8 (35.2, 60.0)           | 48.3 (45.6, 58.7)            |
|                            | <i>6 months post-operative</i>              | 53.5 (29.9, 58.7)           | 53.5 (40.4, 58.7)            |
| <b>CHQ-CF87 ****</b>       |                                             |                             |                              |

|                                       |                                     |                                     |                            |
|---------------------------------------|-------------------------------------|-------------------------------------|----------------------------|
| <b>Global Health</b>                  | <b>6 weeks post-operative</b>       |                                     | <b>85.0 (60.0, 100.0)</b>  |
|                                       | <b>6 months post-operative</b>      |                                     | <b>92.5 (57.5, 100.0)</b>  |
| <b>Global behaviour item</b>          | <b>6 weeks post-operative</b>       |                                     | <b>100.0 (85.0, 100.0)</b> |
|                                       | <b>6 months post-operative</b>      |                                     | <b>85.0 (42.5, 92.5)</b>   |
| Physical functioning                  | 6 weeks post-operative              |                                     | 81.5 (55.6, 100.0)         |
|                                       | 6 months post-operative             |                                     | 96.3 (90.7, 100.0)         |
| Role/Social limitations - Emotional   | 6 weeks post-operative              |                                     | 100.0 (100.0, 100.0)       |
|                                       | 6 months post-operative             |                                     | 100.0 (61.1, 100.0)        |
| Role/Social limitations - Behavioural | 6 weeks post-operative              |                                     | 100.0 (100.0, 100.0)       |
|                                       | 6 months post-operative             |                                     | 100.0 (50.0, 100.0)        |
| Role/Social limitations - Physical    | 6 weeks post-operative              |                                     | 100.0 (33.3, 100.0)        |
|                                       | 6 months post-operative             |                                     | 100.0 (100.0, 100.0)       |
| Bodily Pain/Discomfort                | 6 weeks post-operative              |                                     | 70.0 (50.0, 100.0)         |
|                                       | 6 months post-operative             |                                     | 80.0 (50.0, 90.0)          |
| Behaviour                             | 6 weeks post-operative              |                                     | 96.2 (92.6, 100.0)         |
|                                       | 6 months post-operative             |                                     | 87.4 (53.2, 94.4)          |
| Mental Health                         | 6 weeks post-operative              |                                     | 82.8 (81.3, 90.6)          |
|                                       | 6 months post-operative             |                                     | 82.8 (49.9, 89.8)          |
| Self Esteem                           | 6 weeks post-operative              |                                     | 91.1 (76.9, 96.2)          |
|                                       | 6 months post-operative             |                                     | 86.6 (52.7, 95.5)          |
| General Health perceptions            | 6 weeks post-operative              |                                     | 73.8 (73.8, 81.3)          |
|                                       | 6 months post-operative             |                                     | 65.8 (46.9, 79.2)          |
| Change in Health                      | 6 weeks post-operative              | About the same now as 1 year ago    | 1/3 (33.3%)                |
|                                       |                                     | Somewhat better now than 1 year ago | 2/3 (66.7%)                |
|                                       | 6 months post-operative             | Somewhat better now than 1 year ago | 1/4 (25.0%)                |
|                                       |                                     | Much better now than 1 year ago     | 3/4 (75.0%)                |
| Family Activities                     | 6 weeks post-operative <sup>b</sup> |                                     | 66.7 (62.5, 70.8)          |
|                                       | 6 months post-operative             |                                     | 100.0 (62.5, 100.0)        |
| Family Cohesion                       | 6 weeks post-operative              |                                     | 85.0 (85.0, 85.0)          |

6 months post-operative

85.0 (72.5, 92.5)

**Notes:**  
Data are presented as median (IQR) or n (%)  
\* For all questionnaire domains, higher scores indicate better health.  
\*\* EQ-5D completed by n=18 (8 SPVR, 10 IPVR) at 6 weeks and n=19 (8 SPVR, 11 IPVR) at 6 months  
\*\*\* SF-36 completed by adults only: n=15 (8 SPVR, 7 IPVR) at 6 weeks; n=14<sup>#</sup> (7 SPVR, 7 IPVR) at 6 months  
\*\*\*\* CHQ-CF87 completed by paediatrics’ only: n=3 (0 SPVR, 3 IPVR) at 6 weeks; n=4 (0 SPVR, 4 IPVR) at 6 months  
<sup>#</sup> One adult patient (randomised to SPVR) was inadvertently sent the child health questionnaire pack at 6 months.  
  
Missing data (SPVR, IPVR):  
<sup>a</sup> Data missing for 1 patient (0, 1)  
<sup>b</sup> Data missing for 1 patient (-, 1)

**Abbreviations:** SPVR=Standard Pulmonary valve replacement; IPVR=Injectable Pulmonary valve replacement; IQR=Interquartile Range; SF-36=36-item Short-Form Health Survey

Supplementary table 8 Secondary outcome: Quality of life questionnaires

| Event                                        | Received SPVR (n=8) |       |                     |       | Received IPVR (n=11) |       |                     |       |
|----------------------------------------------|---------------------|-------|---------------------|-------|----------------------|-------|---------------------|-------|
|                                              | All events          |       | SAEs                |       | All events           |       | SAEs                |       |
|                                              | Events/<br>patients | %     | Events/<br>patients | %     | Events/<br>patients  | %     | Events/<br>patients | %     |
| <b>Any event</b>                             | 12/5                | 62.5% | 4/4                 | 50.0% | 20/8                 | 72.7% | 8/5                 | 45.5% |
| <b>EXPECTED EVENTS</b>                       |                     |       |                     |       |                      |       |                     |       |
| <b>Any expected event</b>                    | 12/5                | 62.5% | 4/4                 | 50.0% | 17/8                 | 72.7% | 5/3                 | 27.3% |
| Cardiopulmonary bypass                       |                     |       |                     |       |                      |       |                     |       |
| Displaced valve                              | 0/0                 | 0.0%  | 0/0                 | 0.0%  | 3/3                  | 27.3% | 1/1                 | 9.1%  |
| Arrhythmias                                  |                     |       |                     |       |                      |       |                     |       |
| SVT/AF requiring treatment                   | 1/1                 | 12.5% | 1/1                 | 12.5% | 0/0                  | 0.0%  | 0/0                 | 0.0%  |
| New pacing <sup>a</sup>                      | 0/0                 | 0.0%  | 0/0                 | 0.0%  | 1/1                  | 9.1%  | 0/0                 | 0.0%  |
| Haemodynamic support                         |                     |       |                     |       |                      |       |                     |       |
| Any inotropes used                           | 4/4                 | 50.0% | 1/1                 | 12.5% | 6/6                  | 54.5% | 1/1                 | 9.1%  |
| Vasodilator used                             | 3/3                 | 37.5% | 0/0                 | 0.0%  | 2/2                  | 18.2% | 0/0                 | 0.0%  |
| Pericardial effusion                         |                     |       |                     |       |                      |       |                     |       |
| Pericardial effusion <sup>b</sup>            | 1/1                 | 12.5% | 0/0                 | 0.0%  | 0/0                  | 0.0%  | 0/0                 | 0.0%  |
| Pulmonary complications                      |                     |       |                     |       |                      |       |                     |       |
| CPAP                                         | 0/0                 | 0.0%  | 0/0                 | 0.0%  | 1/1                  | 9.1%  | 0/0                 | 0.0%  |
| Re-operation                                 |                     |       |                     |       |                      |       |                     |       |
| Re-operation for valve related issues        | 0/0                 | 0.0%  | 0/0                 | 0.0%  | 1/1                  | 9.1%  | 1/1                 | 9.1%  |
| Infective complications during hospital stay |                     |       |                     |       |                      |       |                     |       |
| Valve related sepsis                         | 0/0                 | 0.0%  | 0/0                 | 0.0%  | 1/1                  | 9.1%  | 1/1                 | 9.1%  |
| Respiratory infection                        | 1/1                 | 12.5% | 1/1                 | 12.5% | 1/1                  | 9.1%  | 0/0                 | 0.0%  |
| Superficial wound infection                  | 1/1                 | 12.5% | 0/0                 | 0.0%  | 0/0                  | 0.0%  | 0/0                 | 0.0%  |
| Infective complications post discharge       |                     |       |                     |       |                      |       |                     |       |
| Groin (Rt)                                   | 1/1                 | 12.5% | 1/1                 | 12.5% | 0/0                  | 0.0%  | 0/0                 | 0.0%  |
| Pulmonary valve and septic embolism in lung  | 0/0                 | 0.0%  | 0/0                 | 0.0%  | 1/1                  | 9.1%  | 1/1                 | 9.1%  |
| <b>UNEXPECTED EVENTS</b>                     |                     |       |                     |       |                      |       |                     |       |
| <b>Any unexpected event <sup>c</sup></b>     |                     |       | 0/0                 | 0.0%  |                      |       | 3/2                 | 10.5% |

| Event                           | Received SPVR (n=8) |   |                     |      | Received IPVR (n=11) |   |                     |      |
|---------------------------------|---------------------|---|---------------------|------|----------------------|---|---------------------|------|
|                                 | All events          |   | SAEs                |      | All events           |   | SAEs                |      |
|                                 | Events/<br>patients | % | Events/<br>patients | %    | Events/<br>patients  | % | Events/<br>patients | %    |
| Surgical and medical procedures |                     |   |                     |      |                      |   |                     |      |
| Removal of foreign body         |                     |   | 0/0                 | 0.0% |                      |   | 1/1                 | 9.1% |
| Pulmonary valve replacement     |                     |   | 0/0                 | 0.0% |                      |   | 1/1                 | 9.1% |
| Infections and infestations     |                     |   |                     |      |                      |   |                     |      |
| Endocarditis                    |                     |   | 0/0                 | 0.0% |                      |   | 1/1                 | 9.1% |

Notes:  
SAEs are a subset of AEs.  
<sup>a</sup> The pacing was single. Temporary pacing did not become permanent.  
<sup>b</sup> The pericardial effusion was not drained  
<sup>c</sup> Further details of unexpected events will be given in Supplementary Table 10

**Abbreviations:** SPVR=Standard Pulmonary valve replacement; IPVR=Injectable Pulmonary valve replacement; SAE=Serious adverse event; MI=Myocardial infarction; SVT=Supraventricular tachycardia; AF=Atrial fibrillation; VF=Ventricular fibrillation; VT=Ventricular tachycardia; LVAD=Left ventricular assist device; ECMO=Extracorporeal membrane oxygenation; CPAP=Continuous positive airway pressure; ARDS=Acute respiratory distress syndrome; GI=Gastrointestinal; TIA=Transient ischemic attack

Supplementary table 9– Expected and unexpected adverse events and serious adverse events both in-hospital and during trial follow-up

| Event                       | Full description                                                                                                                                            | Timing                         | Maximum intensity | Relatedness            | Group |
|-----------------------------|-------------------------------------------------------------------------------------------------------------------------------------------------------------|--------------------------------|-------------------|------------------------|-------|
| Removal of foreign body     | x3 swabs left inside patient - found on post-operative chest x-ray. Chest re-opened on PICU to retrieve swabs.                                              | Post-surgery but pre-discharge | Mild              | Not related            | IPVR  |
| Endocarditis                | Was admitted with 10-day history of fever, shortness of breath, abdominal pain, cough, loss of appetite, intermittent nausea and vomiting and loose stools. | Post-discharge                 | Moderate          | Unlikely to be related | IPVR  |
| Pulmonary valve replacement |                                                                                                                                                             |                                |                   |                        |       |

**Abbreviations:** SAE=Serious adverse event; IPVR=Injectable Pulmonary valve; PICU=Paediatric intensive care unit

*Supplementary table 10– Details of unexpected serious adverse events*
